# Supplementary material for: Immediate Adverse Events Following COVID-19 Vaccination in Australian Pharmacies: A Retrospective Review
Source: MDPI journal article supplement (doi:10.3390/vaccines10122041), 2022-11-29
Supplement: s1 [file s1]

**Table S1.** Number of I-AEFI identified in free text by brand and dose of COVID-19 vaccine

|                            | AstraZeneca |   | Moderna |   |   |   | COVID-19 Vaccine<br>Novavax |   | Pfizer |   |   |   | Pfizer Paediatric |   |
|----------------------------|-------------|---|---------|---|---|---|-----------------------------|---|--------|---|---|---|-------------------|---|
|                            | Dose        |   | Dose    |   |   |   | Dose                        |   | Dose   |   |   |   | Dose              |   |
|                            | 1           | 2 | 1       | 2 | 3 | 4 | 1                           | 2 | 1      | 2 | 3 | 4 | 1                 | 2 |
| Angina pectoris            | 0           | 0 | 1       | 1 | 0 | 0 | 0                           | 0 | 0      | 0 | 0 | 0 | 0                 | 0 |
| Anxiety                    | 2           | 1 | 0       | 1 | 0 | 0 | 0                           | 0 | 0      | 0 | 0 | 0 | 0                 | 0 |
| Asthma                     | 0           | 0 | 1       | 0 | 0 | 0 | 0                           | 0 | 0      | 0 | 0 | 0 | 0                 | 0 |
| Cardiac flutter            | 0           | 0 | 1       | 0 | 0 | 0 | 0                           | 0 | 0      | 0 | 0 | 0 | 0                 | 0 |
| Chest pain                 | 1           | 0 | 0       | 1 | 0 | 0 | 0                           | 0 | 0      | 0 | 0 | 0 | 0                 | 0 |
| Cold sweat                 | 0           | 0 | 0       | 0 | 0 | 0 | 0                           | 0 | 1      | 0 | 0 | 0 | 0                 | 0 |
| Confusional state          | 1           | 0 | 0       | 0 | 0 | 0 | 0                           | 0 | 0      | 0 | 0 | 0 | 0                 | 0 |
| Cyanosis                   | 0           | 0 | 0       | 0 | 0 | 0 | 0                           | 0 | 0      | 0 | 0 | 1 | 0                 | 0 |
| Dysgeusia                  | 2           | 0 | 0       | 0 | 0 | 1 | 0                           | 0 | 0      | 0 | 0 | 0 | 0                 | 0 |
| Dyspepsia                  | 0           | 0 | 1       | 0 | 0 | 0 | 0                           | 0 | 0      | 0 | 0 | 0 | 0                 | 0 |
| Dysphonia                  | 1           | 0 | 0       | 0 | 0 | 0 | 0                           | 0 | 0      | 0 | 0 | 0 | 0                 | 0 |
| Dyspnoea                   | 0           | 0 | 1       | 0 | 0 | 0 | 0                           | 0 | 0      | 1 | 0 | 0 | 0                 | 0 |
| Dystonia                   | 0           | 0 | 0       | 0 | 0 | 0 | 0                           | 0 | 0      | 1 | 0 | 0 | 0                 | 0 |
| Erythema                   | 1           | 0 | 0       | 0 | 0 | 0 | 0                           | 0 | 0      | 0 | 0 | 0 | 0                 | 0 |
| Fatigue                    | 0           | 0 | 2       | 0 | 0 | 2 | 0                           | 0 | 0      | 0 | 0 | 0 | 0                 | 0 |
| Feeling abnormal           | 0           | 0 | 1       | 0 | 0 | 0 | 0                           | 0 | 0      | 0 | 0 | 0 | 0                 | 0 |
| Feeling hot                | 1           | 0 | 2       | 1 | 0 | 0 | 0                           | 0 | 0      | 1 | 0 | 0 | 0                 | 0 |
| Foaming at mouth           | 1           | 0 | 0       | 0 | 0 | 0 | 0                           | 0 | 0      | 0 | 0 | 0 | 0                 | 0 |
| Headache                   | 0           | 0 | 2       | 1 | 0 | 0 | 0                           | 0 | 0      | 0 | 0 | 0 | 0                 | 0 |
| Heart rate decreased       | 1           | 0 | 0       | 0 | 0 | 0 | 0                           | 0 | 0      | 0 | 0 | 0 | 0                 | 0 |
| Hot flush                  | 1           | 0 | 0       | 0 | 0 | 0 | 0                           | 0 | 0      | 0 | 0 | 0 | 0                 | 0 |
| Hyperhidrosis              | 10          | 0 | 3       | 3 | 0 | 2 | 0                           | 0 | 1      | 0 | 0 | 1 | 0                 | 0 |
| Hypertension               | 0           | 0 | 2       | 0 | 0 | 0 | 0                           | 0 | 0      | 0 | 0 | 0 | 0                 | 0 |
| Hyperventilation           | 0           | 0 | 1       | 0 | 0 | 0 | 0                           | 0 | 0      | 0 | 0 | 0 | 0                 | 0 |
| Hypoaesthesia              | 1           | 1 | 1       | 0 | 0 | 0 | 0                           | 0 | 0      | 0 | 0 | 0 | 0                 | 0 |
| Hypoaesthesia oral         | 0           | 0 | 1       | 0 | 0 | 0 | 0                           | 0 | 0      | 0 | 0 | 0 | 0                 | 0 |
| Hypotension                | 0           | 0 | 3       | 0 | 0 | 0 | 0                           | 0 | 1      | 0 | 0 | 0 | 0                 | 0 |
| Influenza like illness     | 3           | 0 | 0       | 1 | 0 | 1 | 0                           | 0 | 0      | 0 | 0 | 0 | 0                 | 0 |
| Injection site bruising    | 0           | 0 | 0       | 0 | 0 | 1 | 0                           | 0 | 0      | 0 | 0 | 1 | 0                 | 0 |
| Injection site haemorrhage | 8           | 2 | 5       | 1 | 0 | 1 | 0                           | 0 | 0      | 0 | 0 | 0 | 0                 | 0 |

[illegible]
