# Supplementary material for: Immediate Adverse Events Following COVID-19 Vaccination in Australian Pharmacies: A Retrospective Review
Source: MDPI journal article supplement (doi:10.3390/vaccines10122041), 2022-11-29
Supplement: s1 [file s1]

**Table S2.** Management of MedDRA mapped reactions by pre-defined management and other management.

|                           | AD | AMB | LD | SM | PM | W | S | SS | AH | E | Info | TGA | Cold | Lift<br>legs | Juice | BP | BPM | BSL | Para | FU<br>EOD | Sit | O2 | °C | MB | Pred | TP | A-I |
|---------------------------|----|-----|----|----|----|---|---|----|----|---|------|-----|------|--------------|-------|----|-----|-----|------|-----------|-----|----|----|----|------|----|-----|
| Anxiety                   | 0  | 1   | 2  | 0  | 1  | 0 | 0 | 1  | 0  | 0 | 0    | 0   | 0    | 0            | 0     | 1  | 1   | 0   | 0    | 0         | 0   | 0  | 0  | 2  | 0    | 0  | 0   |
| Asthma                    | 0  | 0   | 0  | 1  | 1  | 1 | 0 | 0  | 0  | 0 | 0    | 0   | 0    | 0            | 0     | 0  | 0   | 0   | 0    | 0         | 1   | 0  | 0  | 1  | 0    | 0  | 0   |
| Cardiac flutter           | 0  | 0   | 0  | 1  | 0  | 0 | 0 | 0  | 0  | 0 | 0    | 0   | 0    | 0            | 0     | 0  | 0   | 0   | 0    | 0         | 0   | 0  | 0  | 0  | 0    | 0  | 0   |
| Chest pain                | 0  | 1   | 0  | 1  | 1  | 0 | 0 | 0  | 0  | 0 | 0    | 0   | 0    | 0            | 0     | 1  | 0   | 0   | 0    | 0         | 0   | 0  | 0  | 1  | 0    | 0  | 0   |
| Cold sweat                | 0  | 0   | 1  | 0  | 0  | 0 | 0 | 0  | 0  | 0 | 0    | 0   | 0    | 0            | 0     | 0  | 0   | 0   | 0    | 0         | 0   | 0  | 0  | 0  | 0    | 0  | 0   |
| Confusional<br>state      | 0  | 1   | 1  | 0  | 0  | 0 | 1 | 0  | 0  | 0 | 0    | 0   | 0    | 0            | 0     | 0  | 0   | 1   | 0    | 1         | 0   | 0  | 0  | 0  | 0    | 0  | 0   |
| Cyanosis                  | 0  | 0   | 1  | 0  | 0  | 1 | 0 | 0  | 0  | 0 | 0    | 0   | 0    | 1            | 0     | 0  | 0   | 0   | 0    | 0         | 0   | 0  | 0  | 0  | 0    | 0  | 0   |
| Dysgeusia                 | 0  | 0   | 1  | 2  | 1  | 0 | 0 | 0  | 0  | 0 | 1    | 0   | 0    | 0            | 0     | 0  | 0   | 0   | 0    | 0         | 0   | 0  | 0  | 0  | 0    | 0  | 0   |
| Dyspepsia                 | 0  | 0   | 0  | 1  | 0  | 1 | 0 | 0  | 0  | 0 | 0    | 0   | 0    | 0            | 0     | 0  | 0   | 0   | 0    | 0         | 1   | 0  | 0  | 0  | 0    | 0  | 0   |
| Dysphonia                 | 0  | 1   | 0  | 0  | 0  | 0 | 0 | 0  | 0  | 0 | 0    | 0   | 0    | 0            | 0     | 0  | 0   | 0   | 0    | 0         | 0   | 0  | 0  | 0  | 0    | 0  | 0   |
| Dyspnoea                  | 1  | 2   | 2  | 0  | 0  | 0 | 0 | 0  | 0  | 0 | 0    | 0   | 1    | 0            | 0     | 0  | 0   | 0   | 0    | 0         | 0   | 0  | 0  | 0  | 0    | 0  | 0   |
| Dystonia                  | 0  | 0   | 1  | 0  | 1  | 0 | 0 | 1  | 0  | 0 | 0    | 0   | 0    | 0            | 0     | 0  | 1   | 0   | 0    | 0         | 0   | 0  | 0  | 1  | 0    | 0  | 0   |
| Erythema                  | 0  | 0   | 0  | 0  | 0  | 0 | 0 | 0  | 1  | 0 | 0    | 0   | 0    | 0            | 0     | 0  | 0   | 0   | 0    | 0         | 1   | 0  | 0  | 0  | 0    | 0  | 0   |
| Fatigue                   | 0  | 0   | 0  | 0  | 0  | 0 | 0 | 0  | 0  | 0 | 0    | 0   | 0    | 0            | 0     | 0  | 0   | 0   | 0    | 0         | 0   | 0  | 1  | 0  | 0    | 0  | 0   |
| Feeling<br>abnormal       | 0  | 0   | 0  | 0  | 1  | 0 | 0 | 0  | 1  | 0 | 0    | 0   | 0    | 0            | 0     | 0  | 0   | 0   | 0    | 0         | 0   | 0  | 0  | 0  | 0    | 0  | 0   |
| Feeling hot               | 0  | 1   | 0  | 2  | 4  | 1 | 0 | 0  | 0  | 2 | 0    | 0   | 0    | 0            | 0     | 0  | 0   | 0   | 0    | 0         | 2   | 0  | 0  | 1  | 0    | 0  | 0   |
| Foaming at<br>mouth       | 0  | 0   | 1  | 0  | 1  | 1 | 1 | 0  | 0  | 0 | 0    | 0   | 0    | 0            | 0     | 0  | 0   | 0   | 0    | 0         | 0   | 0  | 0  | 0  | 0    | 0  | 0   |
| Headache                  | 0  | 2   | 2  | 0  | 0  | 1 | 0 | 0  | 0  | 0 | 1    | 0   | 0    | 0            | 0     | 0  | 0   | 0   | 1    | 0         | 0   | 0  | 0  | 0  | 0    | 0  | 0   |
| Heart rate<br>decreased   | 0  | 0   | 0  | 0  | 1  | 0 | 0 | 0  | 0  | 0 | 0    | 0   | 0    | 0            | 0     | 1  | 1   | 0   | 0    | 0         | 1   | 0  | 0  | 0  | 0    | 0  | 0   |
| Hot flush                 | 0  | 0   | 0  | 0  | 0  | 1 | 0 | 0  | 0  | 0 | 0    | 0   | 0    | 0            | 0     | 1  | 1   | 0   | 0    | 0         | 0   | 0  | 0  | 0  | 0    | 0  | 0   |
| Hyperhidrosis             | 0  | 3   | 9  | 1  | 3  | 8 | 4 | 0  | 0  | 0 | 0    | 0   | 2    | 0            | 0     | 0  | 0   | 0   | 1    | 1         | 2   | 0  | 0  | 1  | 0    | 0  | 0   |
| Hypertension              | 0  | 1   | 1  | 0  | 0  | 1 | 0 | 0  | 0  | 0 | 0    | 0   | 0    | 0            | 0     | 1  | 1   | 0   | 0    | 0         | 0   | 0  | 0  | 0  | 0    | 0  | 0   |
| Hyperventilatio<br>n      | 0  | 1   | 0  | 0  | 0  | 0 | 0 | 0  | 0  | 0 | 0    | 0   | 0    | 0            | 0     | 0  | 0   | 0   | 0    | 0         | 0   | 0  | 0  | 0  | 0    | 0  | 0   |
| Hypoaesthesia             | 0  | 0   | 0  | 0  | 2  | 0 | 0 | 0  | 0  | 0 | 0    | 0   | 0    | 0            | 0     | 0  | 0   | 0   | 0    | 0         | 0   | 0  | 0  | 0  | 0    | 0  | 0   |
| Hypoaesthesia<br>oral     | 0  | 0   | 1  | 0  | 1  | 1 | 0 | 0  | 0  | 0 | 0    | 0   | 0    | 0            | 0     | 1  | 1   | 0   | 0    | 0         | 0   | 1  | 0  | 0  | 0    | 0  | 0   |
| Hypotension               | 0  | 0   | 2  | 0  | 1  | 2 | 2 | 0  | 0  | 0 | 0    | 0   | 0    | 0            | 0     | 2  | 2   | 0   | 0    | 0         | 1   | 0  | 0  | 0  | 0    | 0  | 0   |
| Influenza like<br>illness | 0  | 0   | 1  | 1  | 0  | 0 | 0 | 0  | 0  | 1 | 0    | 0   | 0    | 0            | 0     | 0  | 0   | 0   | 1    | 0         | 0   | 0  | 0  | 1  | 0    | 0  | 1   |



|                       |   |   |   |   |   |   |   |   |   |   |   |   |   |   |   |   |   |   |   |   |   |   |   |   |   |   |
|-----------------------|---|---|---|---|---|---|---|---|---|---|---|---|---|---|---|---|---|---|---|---|---|---|---|---|---|---|
| Vaccination site rash | 0 | 0 | 0 | 0 | 1 | 0 | 0 | 0 | 3 | 0 | 0 | 0 | 0 | 0 | 0 | 0 | 0 | 0 | 0 | 0 | 0 | 0 | 0 | 0 | 1 | 0 |
| Vision blurred        | 0 | 1 | 2 | 0 | 2 | 2 | 0 | 0 | 0 | 0 | 0 | 0 | 0 | 0 | 0 | 1 | 1 | 0 | 0 | 0 | 0 | 0 | 0 | 0 | 0 | 0 |

AD—administered adrenaline; AMB—called ambulance; LD—laid patient down; SM—self-monitor at home for worsening symptoms; PM—monitor in pharmacy until symptoms resolve; W—give glass of water; S—give sugar (glucose, lollipop, chocolate); SS—give salbutamol via spacer; AH—give antihistamine; E—give electrolytes; Info—provide government information on vaccine or consumer medicines information; TGA—report to Therapeutic Goods Administration; Cold—give cold compress/cold pack; Lift legs—elevated legs; Juice—give patient juice; BP—checked blood pressure; BPM—check heart rate/pulse; BSL—checked blood sugar level; Para—give paracetamol; FU EOD—follow-up with patient at the end of the day; Sit—sit patient down; O2—check oxygen saturation; °C—check temperature; MB—monitor breathing; Pred—advised to take prednisolone; TP—give topical preparation; A-I—give anti-inflammatory
